# Supplementary material for: DAP3 promotes mitochondrial activity and tumour progression in hepatocellular carcinoma by regulating MT-ND5 expression
Source: PubMed Central journal article supplement (PMC11289107; doi:10.1038/s41419-024-06912-2), 2024-07-29

**Fig. 1G**

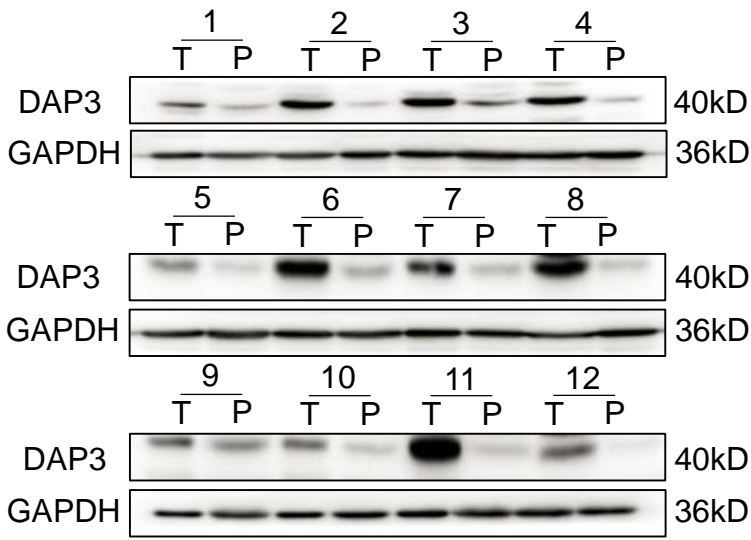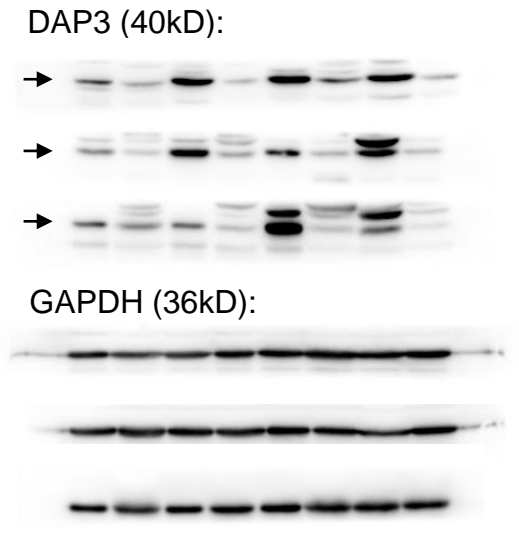

**Fig. 1I**

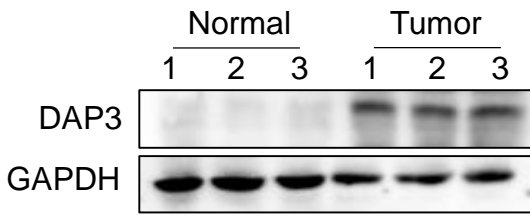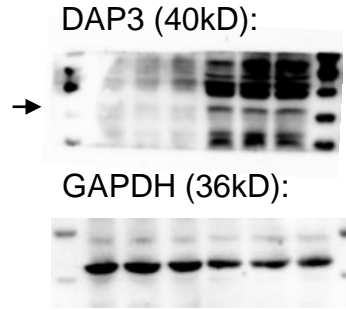

**Fig. 1J**

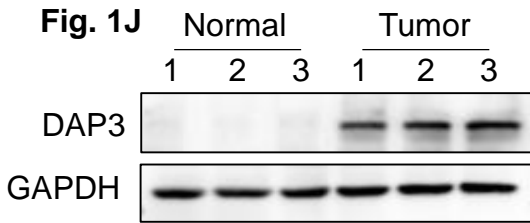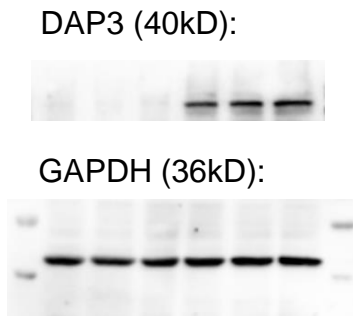

**Fig. 2B**

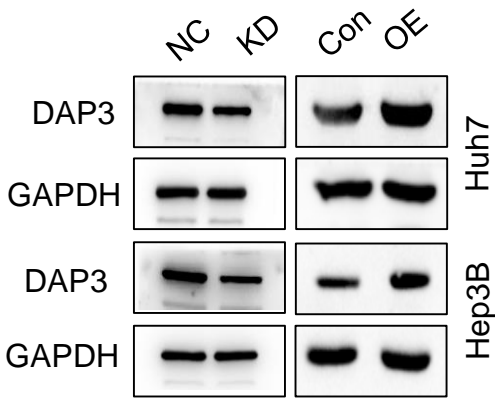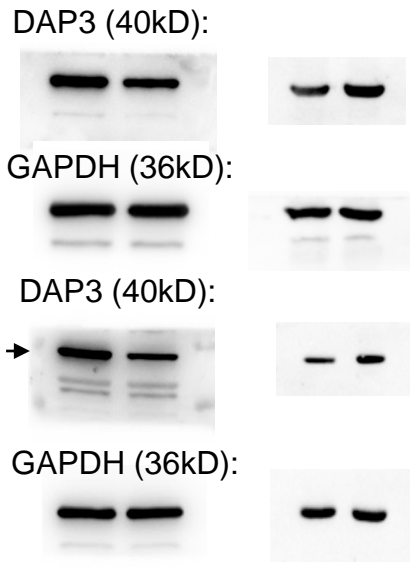

**Fig. 2E**

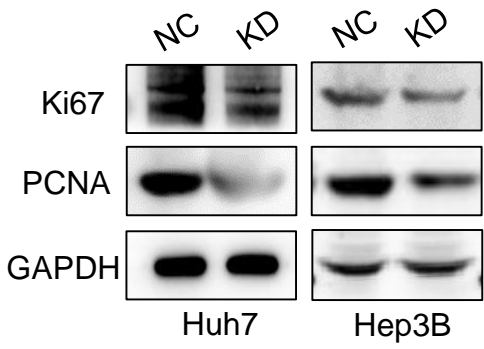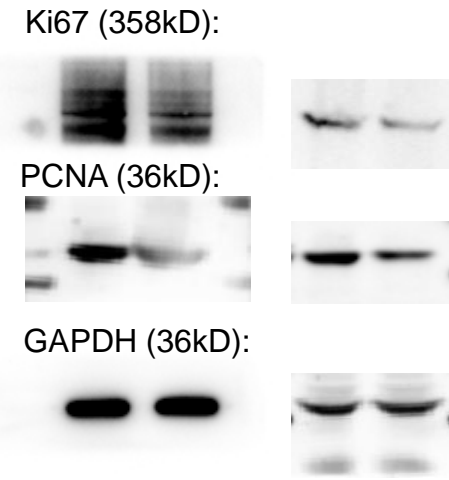

**Fig. 2J**

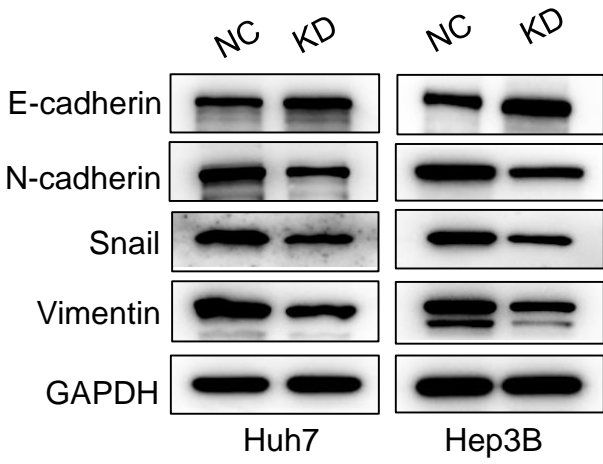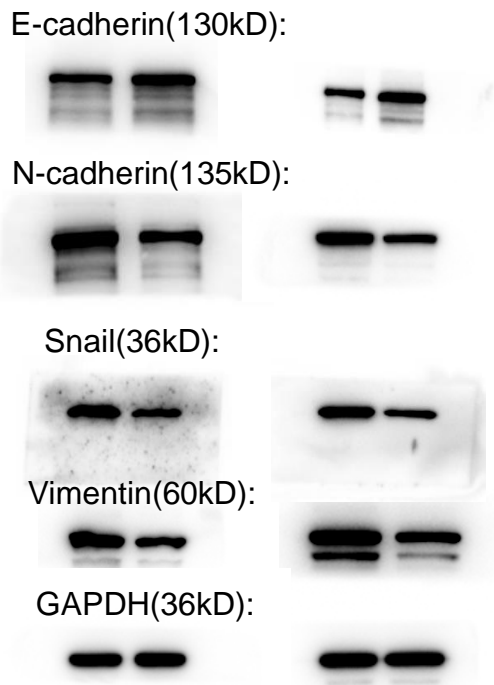

**Fig. 3M**

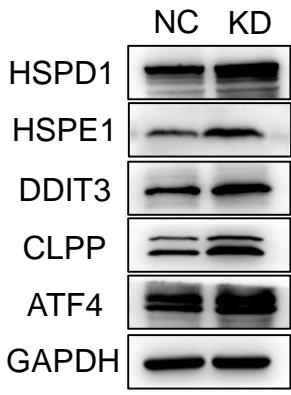

HSPD1 (60kD):

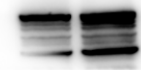

HSPE1 (11kD):

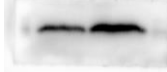

DDIT3 (30kD):

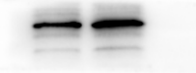

CLPP (26kD):

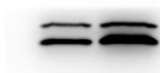

ATF4 (50kD):

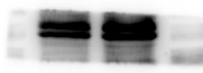

GAPDH (36kD):

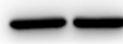

**Fig. 4A**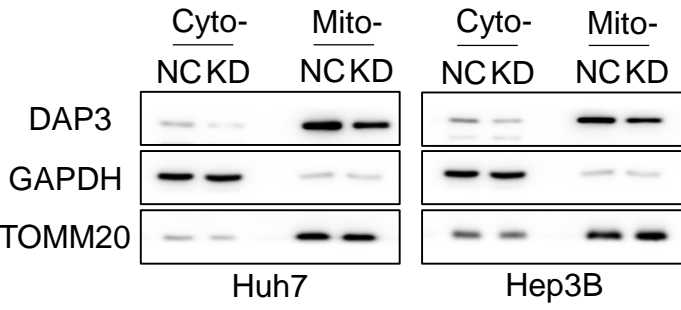

DAP3 (40kD):

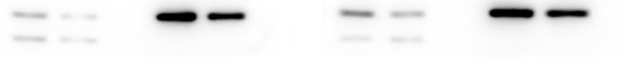

GAPDH (36kD):

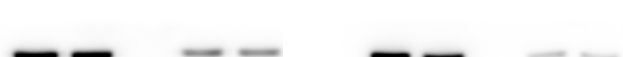

TOMM20 (16kD):

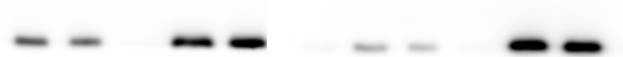**Fig. 4K**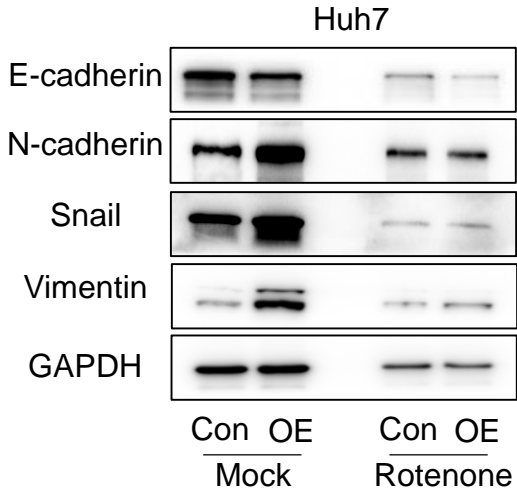

E-cadherin(130kD):

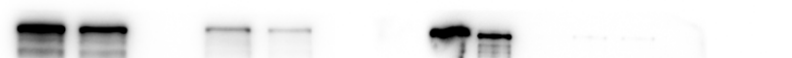

N-cadherin(135kD):

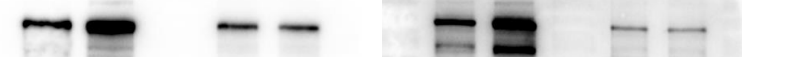

Snail(36kD):

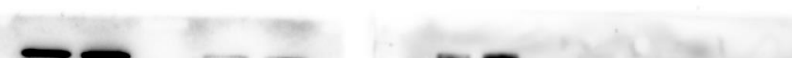

Vimentin(60kD):

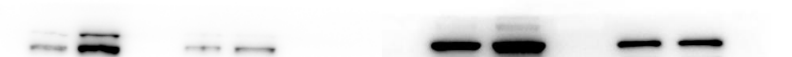

GAPDH(36kD):

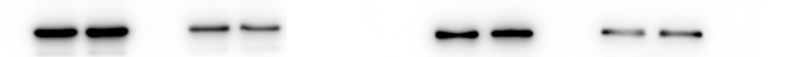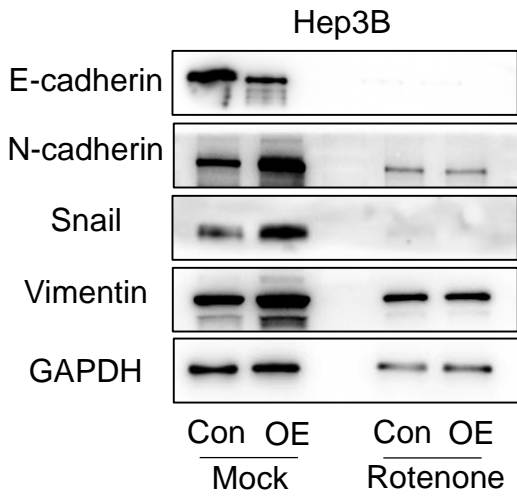

**Fig. 5A**

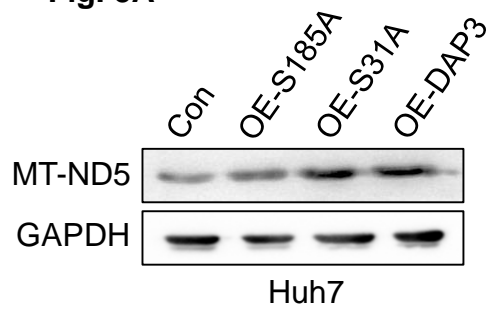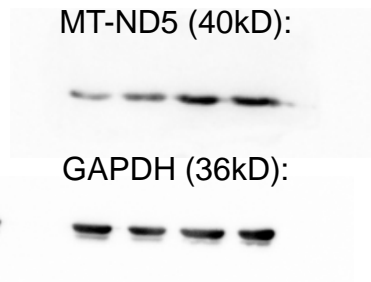

**Fig. 5B**

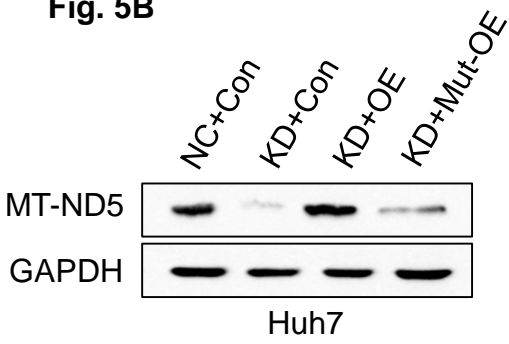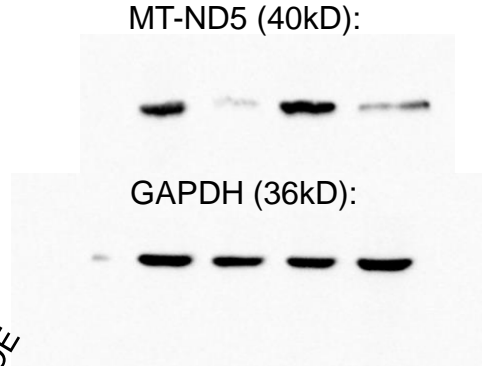

**Fig. 5J**

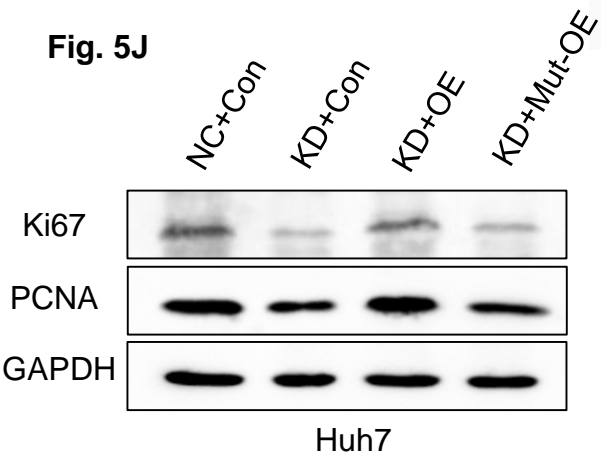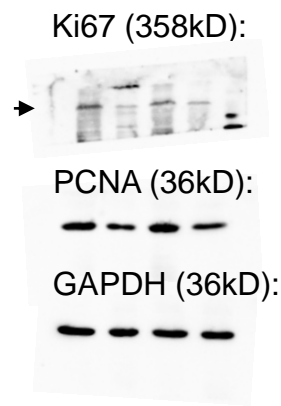

**Fig. 5L**

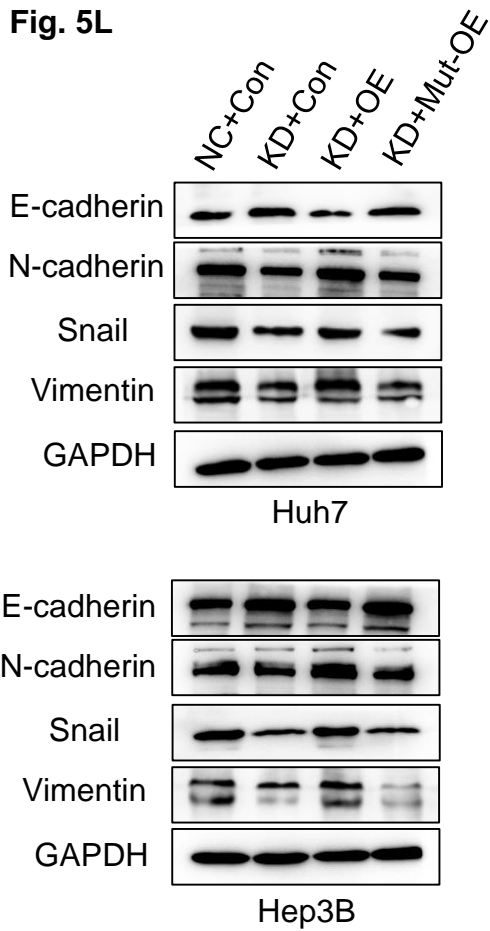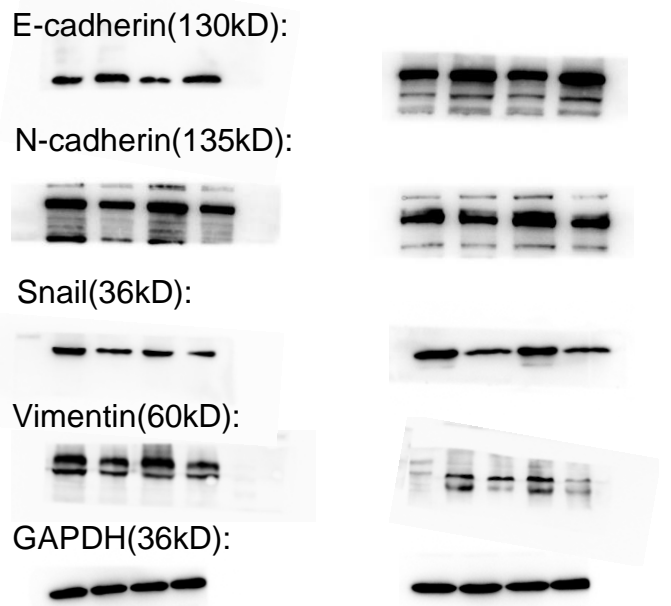

**Fig. 5M**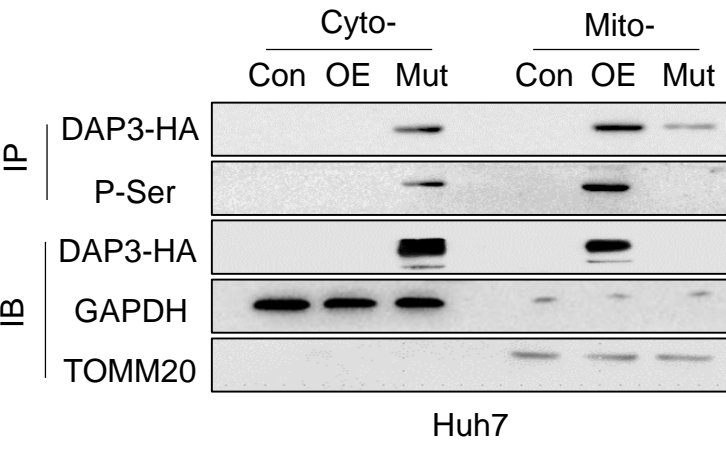

HA-Tag:

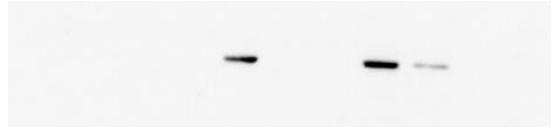

P-Ser :

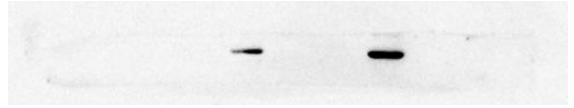

HA-Tag:

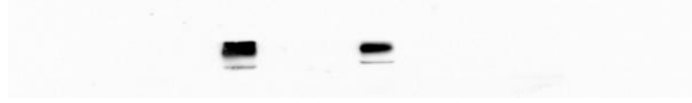

GAPDH (36kD):

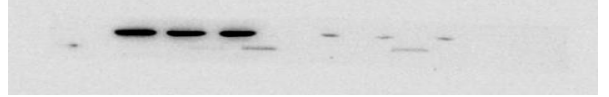

TOMM20 (16kD):

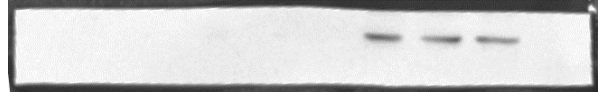**Fig. 5N**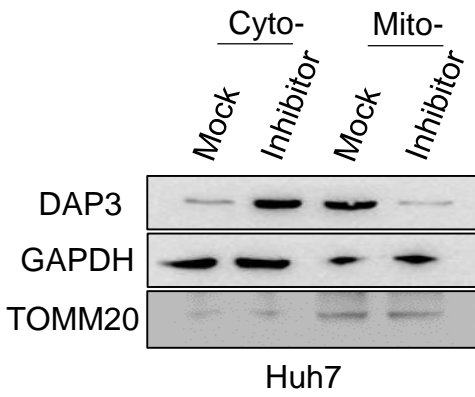

DAP3 (40kD):

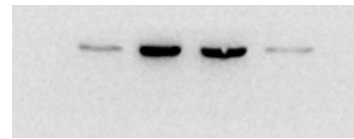

GAPDH (36kD):

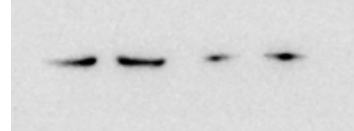

TOMM20 (16kD):

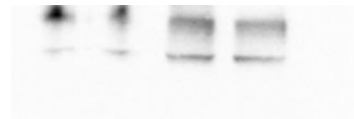

MT-ND5 (40kD):

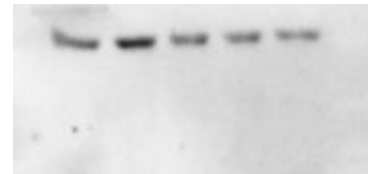

GAPDH (36kD):

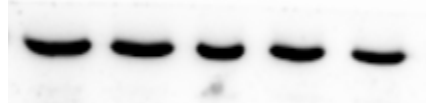**Fig. 5O**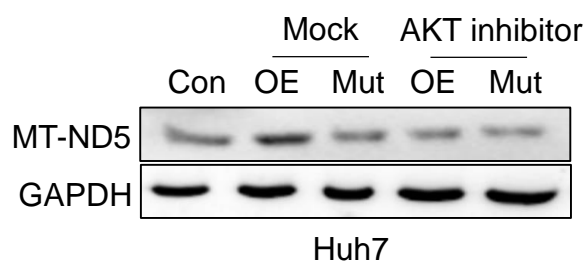

**Fig. 6C**

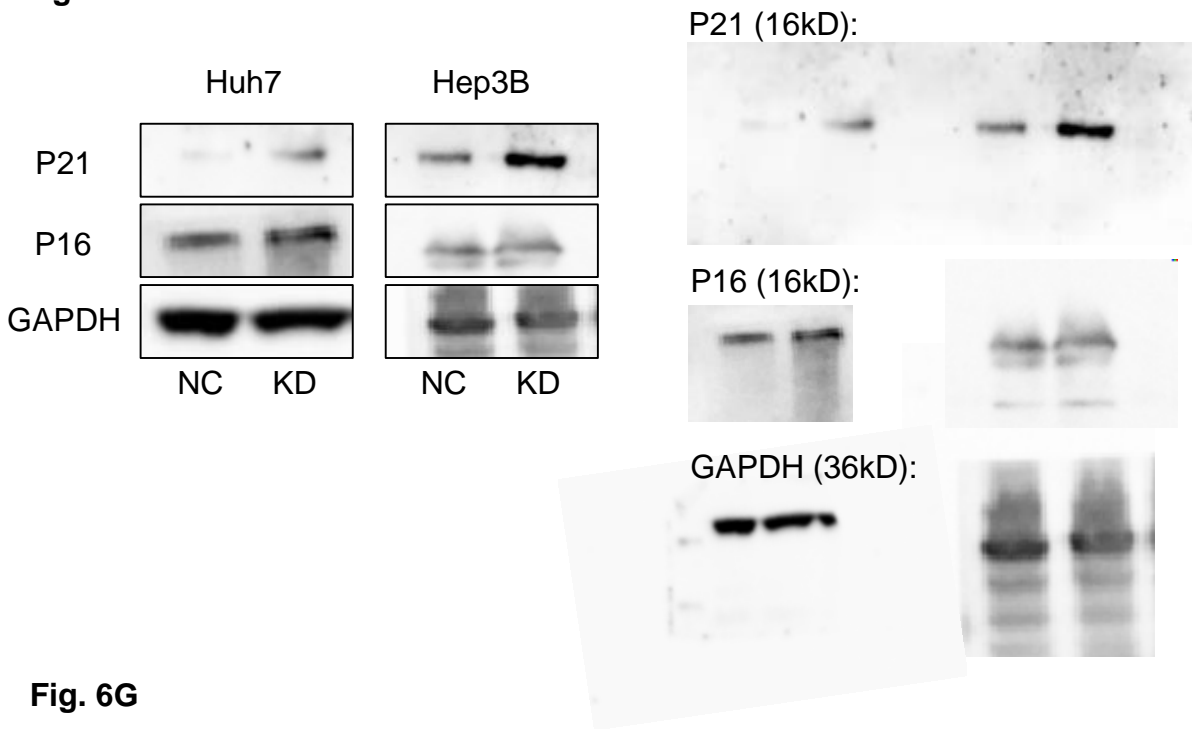

**Fig. 6G**

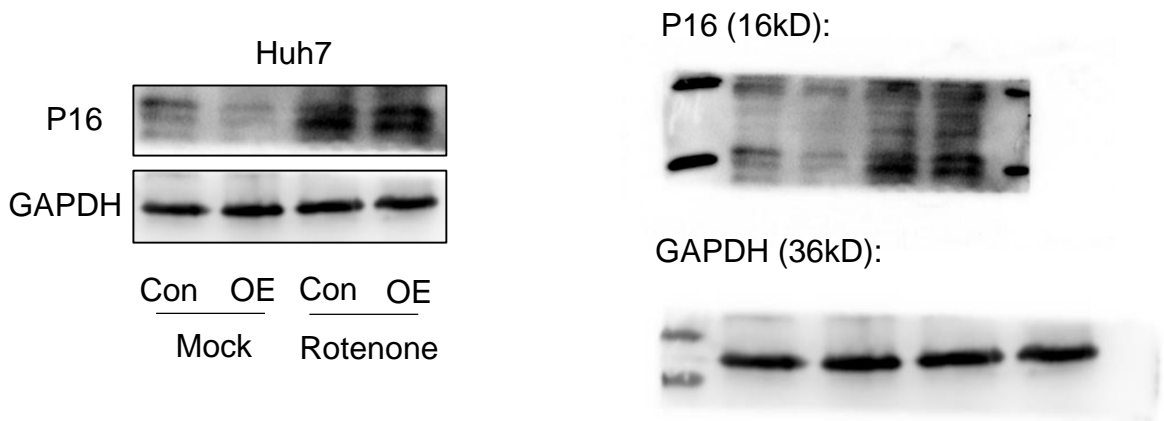

**Fig. 6L**

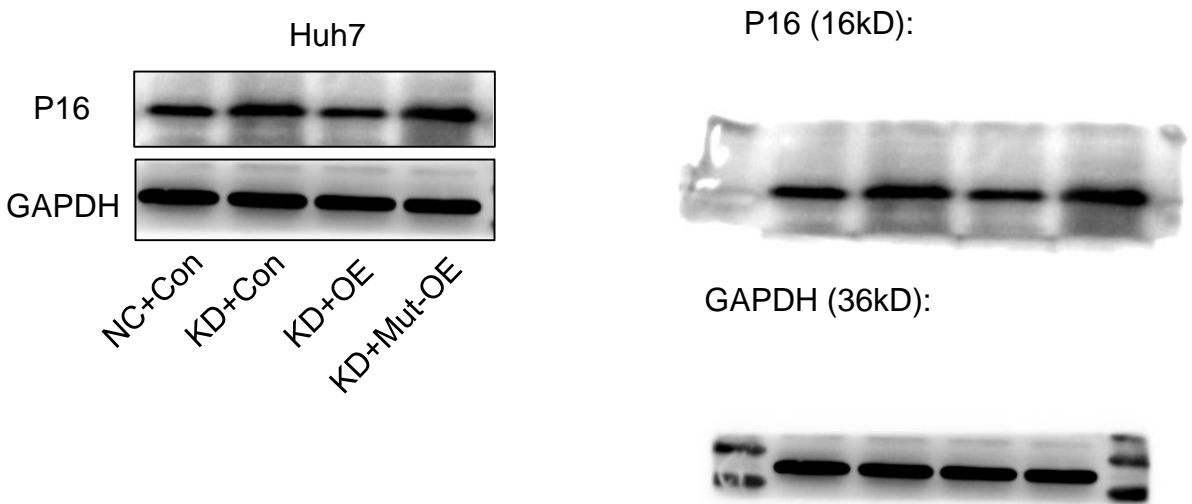

**Fig. S2A**

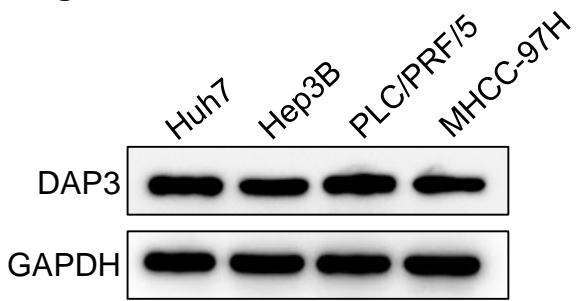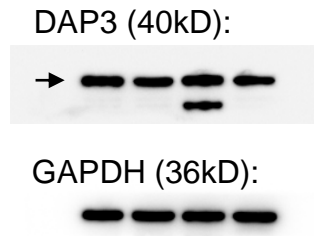

**Fig. S2B**

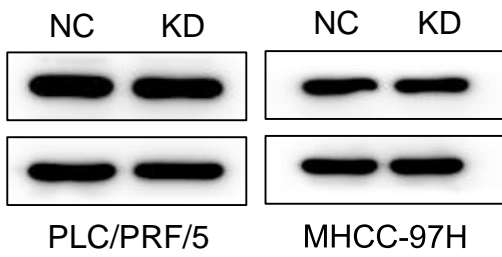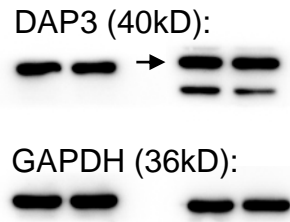

**Fig. S2F**

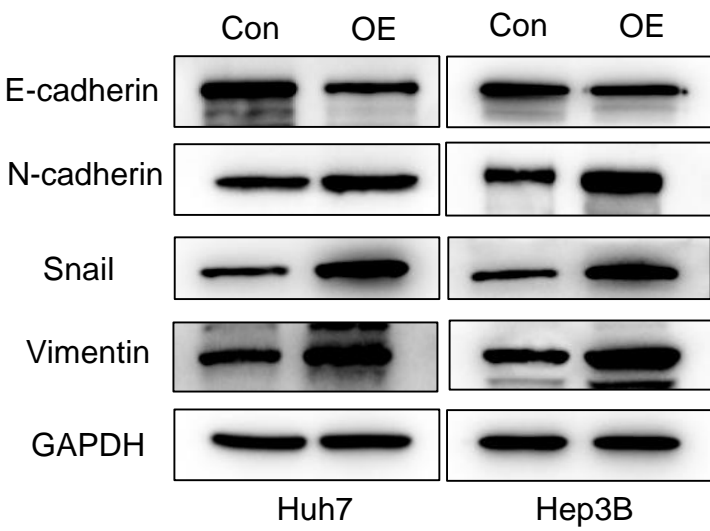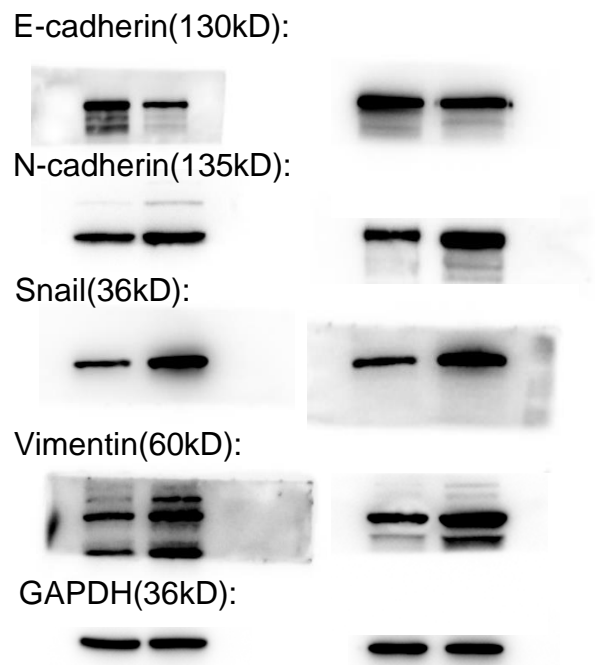



**Fig. S4C**

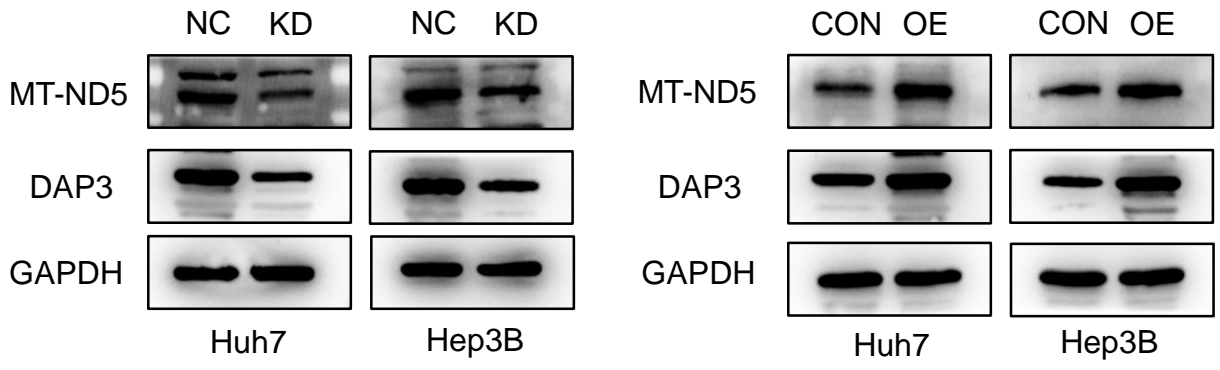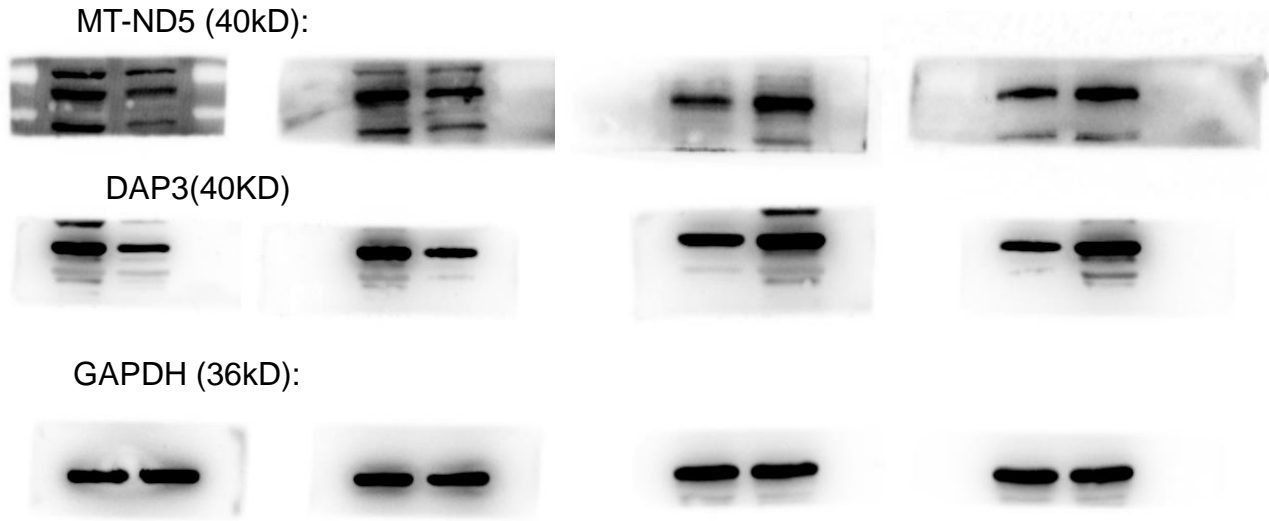

**Fig. S4D**

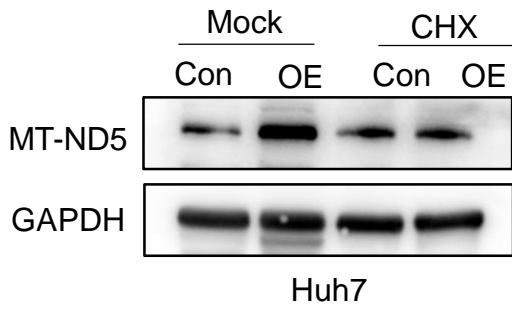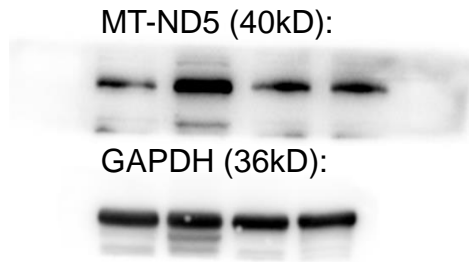

**Fig. S4E**

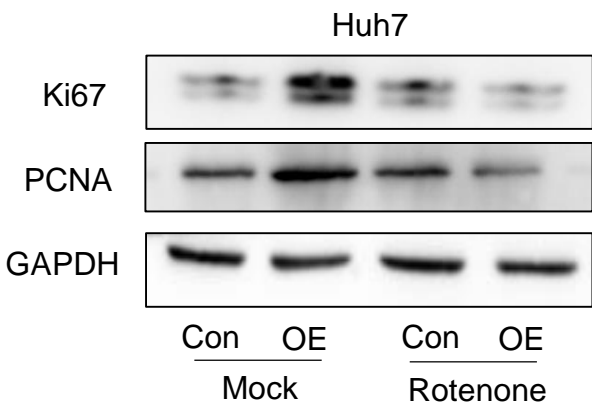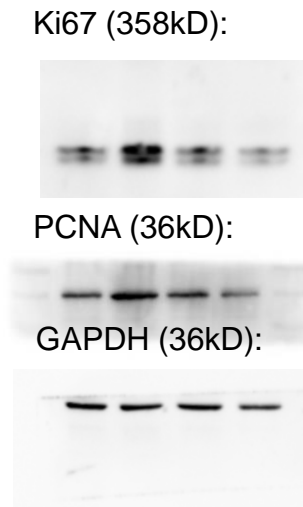

Supplement: 41419_2024_6912_MOESM2_ESM.pdf [file 41419_2024_6912_MOESM2_ESM.pdf]
